# Dietary pattern analysis and biomarkers of low-grade inflammation: a systematic literature review

Janett Barbaresko, Manja Koch, Matthias B Schulze, and Ute Nöthlings

*The purpose of the present literature review was to investigate and summarize the current evidence on associations between dietary patterns and biomarkers of inflammation, as derived from epidemiological studies. A systematic literature search was conducted using PubMed, Web of Science, and EMBASE, and a total of 46 studies were included in the review. These studies predominantly applied principal component analysis, factor analysis, reduced rank regression analysis, the Healthy Eating Index, or the Mediterranean Diet Score. No prospective observational study was found. Patterns identified by reduced rank regression as being statistically significantly associated with biomarkers of inflammation were almost all meat-based or “Western” patterns. Studies using principal component analysis or a priori-defined diet scores found that meat-based or “Western-like” patterns tended to be positively associated with biomarkers of inflammation, predominantly C-reactive protein, while vegetable- and fruit-based or “healthy” patterns tended to be inversely associated. While results of the studies were inconsistent, interventions with presumed healthy diets resulted in reductions of almost all investigated inflammatory biomarkers. In conclusion, prospective studies are warranted to confirm the reported findings and further analyze associations, particularly by investigating dietary patterns as risk factors for changes in inflammatory markers over time.*

© 2013 International Life Sciences Institute

## INTRODUCTION

Chronic low-grade inflammation has been hypothesized as an underlying pathophysiological mechanism linking behavioral factors and obesity to chronic disease risk.<sup>1,2</sup> Elevated levels of inflammatory biomarkers such as C-reactive protein (CRP), interleukin (IL) 6 and 18, fibrinogen, and adhesion molecules (e.g., E-selectin, intercellular adhesion molecule 1 [ICAM-1], and vascular cell adhesion protein 1 [VCAM-1]) have been shown to predict type 2 diabetes,<sup>3,4</sup> cardiovascular disease (CVD),<sup>5</sup> and cancer.<sup>6,7</sup> In contrast, concentrations of the

anti-inflammatory hormone adiponectin were inversely associated with CVD,<sup>8</sup> type 2 diabetes,<sup>9</sup> and obesity-related cancer.<sup>10</sup>

Dietary intake in relation to low-grade inflammation has been investigated in a number of studies exploring nutrients, foods, or dietary patterns.<sup>11,12</sup> The latter integrate dietary behaviors and have a number of advantages over the single-nutrient or food approach. Taking into account that nutrients or foods are rarely eaten in isolation, dietary patterns consider synergistic or antagonistic biochemical interactions among nutrients as well as different food sources of the same nutrient.<sup>13</sup> To investigate

Affiliations: *J Barbaresko* and *U Nöthlings* are with the Department of Nutrition and Food Sciences, Nutritional Epidemiology, University of Bonn, Bonn, Germany, and the Section of Epidemiology, Institute of Experimental Medicine, Christian-Albrechts University of Kiel, Kiel, Germany. *M Koch* is with the Section of Epidemiology, Institute of Experimental Medicine, Christian-Albrechts University of Kiel, Kiel, Germany. *MB Schulze* is with the Department of Molecular Epidemiology, German Institute of Human Nutrition Potsdam-Rehbruecke, Nuthetal, Germany.

Correspondence: *J Barbaresko*, Nutritional Epidemiology, Department of Nutrition and Food Sciences, University of Bonn, Endenicher Allee 11-13, 53115 Bonn, Germany. E-mail: j.barbaresko@uni-bonn.de. Phone: +49-228-73-2068. Fax: +49-228-73-60492.

*Key words:* chronic inflammation, dietary patterns, low-grade inflammation, systematic review

doi:10.1111/nure.12035

Nutrition Reviews® Vol. 71(8):511–527

511

dietary patterns, two general approaches have been established in nutritional epidemiology.<sup>13,14</sup> First, the *a priori* or hypothesis-oriented approach, which determines diet scores or indices (e.g., Healthy Eating Index [HEI], Mediterranean Diet Score [MDS]) based on *a priori* assumptions, like dietary recommendations, which could also be applied in interventional studies. Second, the *a posteriori* or exploratory approach, which is a data-driven method identifying dietary patterns through consideration of dietary behaviors in specific study populations. The most commonly applied *a posteriori* approaches are principal component analysis (PCA) and factor analysis (FA), both of which generate results by combining foods that maximally explain the variance in food intake among participants.<sup>15</sup> In contrast, cluster analysis, as a further exploratory method, identifies dietary patterns by grouping individuals according to similarities in their dietary behavior.<sup>13</sup> Reduced rank regression (RRR) analysis presents a statistical data reduction method that combines the *a priori* and *a posteriori* approaches by exploring the dietary data of the study and applying prior knowledge by selecting disease-related response variables (e.g., biomarkers). The dietary patterns identified explain as much variance as possible in the distribution of response variables, e.g., levels of biomarkers.<sup>14</sup>

The aim of the present systematic literature review was to investigate and summarize the current evidence on associations between dietary patterns identified using *a posteriori* and *a priori* approaches and biomarkers of inflammation, as derived from epidemiological studies. Particular emphasis is placed on dietary patterns predicting change in physiological biomarker levels.

## METHODS

A systematic literature search was conducted using the databases PubMed, Web of Science, and EMBASE using the following search terms: “dietary pattern,” “dietary patterns,” “food pattern,” “food patterns,” “diet score,” “diet scores,” “diet index,” “diet indices,” “eating index,” “eating indices,” “dietary habit,” or “dietary habits” in combination with “inflammat\*,” “C-reactive protein,” “CRP,” “interleukin,” “IL-6,” “tumor necrosis factor,” “TNF,” “adiponectin,” “fibrinogen,” “E-selectin,” “serum amyloid A,” “ICAM-1,” “intercellular adhesion molecule 1,” “VCAM-1,” or “vascular cell adhesion protein 1” in all fields.

The titles and abstracts of identified articles were screened by two authors (J.B. and M.K.) to identify the studies meeting the following inclusion criteria: 1) studies describing the association between blood biomarker(s) of chronic inflammation and *a priori* or *a posteriori* dietary pattern(s); 2) observational

epidemiological studies or intervention studies based on *a priori*-defined dietary patterns; 3) studies in humans; 4) publication in scientific journals (conference abstracts were excluded); and 5) articles published from January 2000 to January 2012. The full-text articles were retrieved for all eligible studies. The following exclusion criteria were additionally applied: 1) studies based on children, adolescents, or pregnant women (examination of the effects of maternal diet only); 2) studies containing less than 50 participants or an intervention group of less than 50 participants; 3) dietary assessment not based on an FFQ, dietary record, dietary history, or 24-h recall; 4) repeated publication of the same study. In the latter case, the study with the larger sample size or the one providing more information on biomarkers was included. No limitations on the language of the publication were applied. The reference lists of the selected studies were manually reviewed to identify additional articles meeting the eligibility criteria.

The following details were extracted from each study: first author and year of publication; study design; participant characteristics (age, disease status); dietary assessment method; dietary pattern approach; dietary patterns identified or diet scores/indices investigated; associations among dietary patterns; and inflammatory biomarkers in the fully adjusted model.

Dietary habits differ across cultures, and *a posteriori* dietary patterns vary in their compositions and descriptive terms as a result, e.g., “Japanese pattern”<sup>16</sup> or “traditional English pattern.”<sup>17</sup> Thus, the compositions of dietary patterns are additionally presented in tables.

Studies restricted to participants with CVD, type 2 diabetes, or other chronic diseases are listed separately because of the generally higher levels of inflammatory biomarkers in participants.

## RESULTS

After duplicates were removed, 647 potentially relevant articles were identified (Figure 1). Review of the titles and abstracts revealed 66 publications that met the inclusion criteria. After reading the full texts of articles, 19 studies were removed for meeting one or more of the exclusion criteria. Additionally, three articles used population data previously presented and provided no additional information. From two reports,<sup>18,19</sup> only additional data were extracted, which supplemented previously reported studies. Screening of reference lists led to the inclusion of two additional studies.<sup>20,21</sup> In total, 46 studies were included in the present review.<sup>16–61</sup>

None of the studies applied a prospective observational design to investigate associations between food patterns and changes in biomarker profiles.

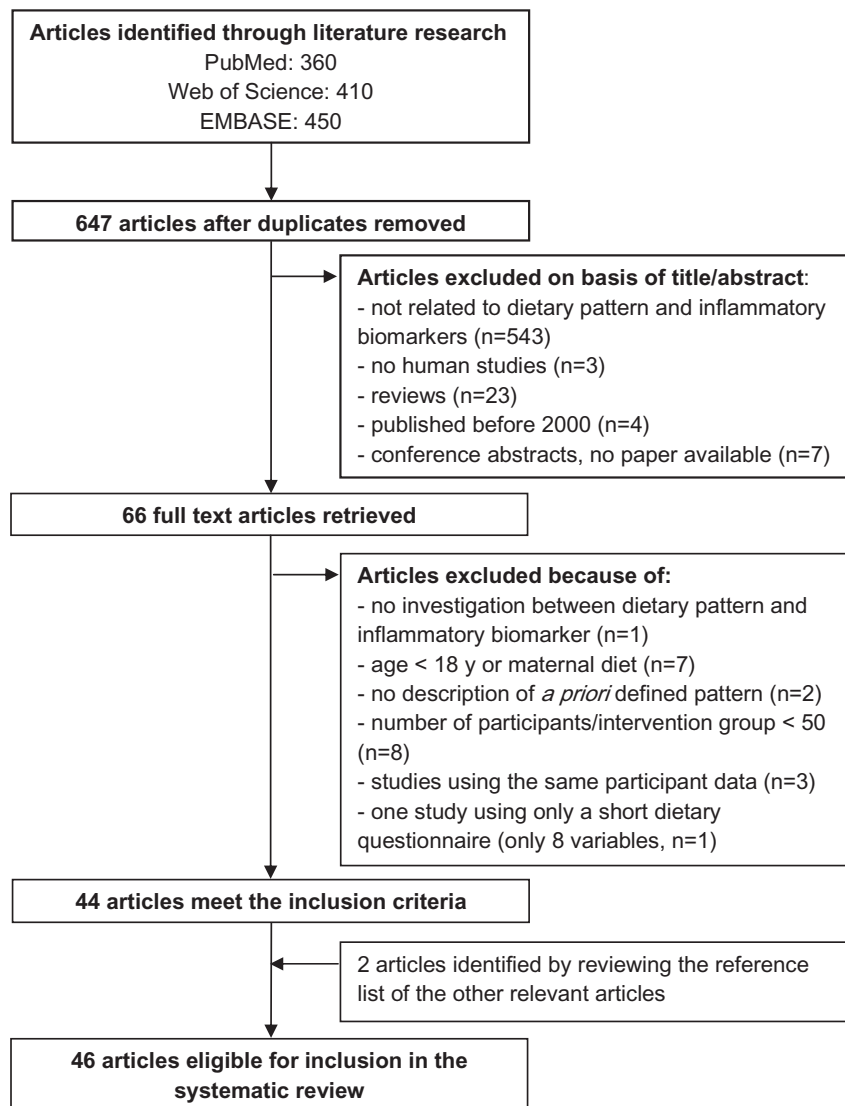

Figure 1 Flow chart illustrating the literature search and study selection process.

### Dietary patterns identified by reduced rank regression analysis

Seven studies<sup>18,22–27</sup> used RRR analysis to identify food patterns predictive for individual sets of biomarkers; some of these included inflammatory markers only and some additionally examined metabolic markers like high-density lipoprotein or blood glucose (Table 1). CRP, as the most frequently investigated marker of chronic inflammation, was included in six of these studies.<sup>18,22,23,25–27</sup> Explained variation for single biomarkers (where provided) ranged from below 1% (IL-18)<sup>22</sup> to 15% (plasminogen activator inhibitor 1)<sup>24</sup>; for combined markers, the range was from 5.01%<sup>22</sup> to 8%.<sup>24</sup> All but one of the food patterns were positively associated with the biomarkers, and almost all of the associations were statistically significant. These patterns collectively included meat (red meat

or processed meat), low-fiber foods (e.g., refined grains), and often alcohol.<sup>18,22–24,26,27</sup> The pattern inversely associated with biomarkers also fit this picture, since it included negative loadings of red meat, beer, and bread, with the exception of whole-grain bread<sup>25</sup>; levels of the anti-inflammatory biomarker adiponectin were positively associated with this food pattern, but CRP was not.<sup>25</sup>

### Dietary patterns identified by principal component analysis or factor analysis

Seventeen studies (Table 2) investigated *a posteriori*-defined dietary patterns using PCA or factor analysis.<sup>16,17,20,22,23,28–39</sup> One study additionally applied partial least square analysis.<sup>22</sup> Fourteen of these studies, reported statistically significant findings for at least one pattern.<sup>16,17,22,23,28–35,38,39</sup> Most of the associations were

**Table 1 Summary of studies investigating the associations between inflammatory biomarkers and dietary patterns identified by reduced rank regression analysis.**

| Reference                                                         | Country | No. and age of participants                           | Dietary assessment method | Components of the dietary pattern                                                                                                                                                                                                                                                                                                 | Response variables                                      | Proportion of explained variance in distribution of biomarkers | Positive ( $\uparrow$ ), inverse ( $\downarrow$ ), and no ( $\leftrightarrow$ ) statistically significant associations ( $t$ )                                                                                                                            |
|-------------------------------------------------------------------|---------|-------------------------------------------------------|---------------------------|-----------------------------------------------------------------------------------------------------------------------------------------------------------------------------------------------------------------------------------------------------------------------------------------------------------------------------------|---------------------------------------------------------|----------------------------------------------------------------|-----------------------------------------------------------------------------------------------------------------------------------------------------------------------------------------------------------------------------------------------------------|
| Meyer et al. (2011) <sup>22</sup>                                 | Germany | 981 men<br>45–64 years                                | 7-day dietary record      | Positive factor loadings for beer, meat (except poultry); negative loadings for sweet bread spread, fresh fruit, cake and pastries, whole-meal bread, condensed milk and cream, fresh vegetables, curd, chocolates, cereals and muesli, butter, nuts, tea, cooked vegetables, cheese                                              | IL-6, IL-18, CRP                                        | Total: 5.01%<br>IL-6: 3.86%<br>IL-18: 0.06%<br>CRP: 11.11%     | IL-6 $\uparrow$ (0.27 <sup>a</sup> )<br>IL-18 $\uparrow$ (0.08 <sup>a</sup> )<br>CRP $\uparrow$ (0.33 <sup>a</sup> )                                                                                                                                      |
| Centritto et al. (2009) <sup>23</sup>                             | Italy   | 7,646 participants<br>$\geq 35$ years                 | FFQ                       | Positive loadings for wine, pasta/other grains, bread, animal fat, beer, red meat; negative loadings for breakfast cereals, yogurt, sugar and sweets                                                                                                                                                                              | HDL, triglycerides, SBP, blood glucose, CRP             | Total: 6%                                                      | CRP $\uparrow$ (n.a.)                                                                                                                                                                                                                                     |
| Liese et al. (2009) <sup>24</sup>                                 | USA     | 880 participants<br>40–69 years                       | FFQ                       | Positive loadings for red meats, low-fiber bread and cereal, dried beans, fried potatoes, tomato vegetables, eggs, cheese, cottage cheese; negative loadings for wine                                                                                                                                                             | PAI-1, fibrinogen                                       | Total: 8%<br>PAI-1: 15%<br>fibrinogen: 1%                      | PAI-1 $\uparrow$ (n.a.)<br>Fibrinogen $\leftrightarrow$ (n.a.)                                                                                                                                                                                            |
| Nettleton et al. (2007) <sup>18</sup>                             | USA     | 5,089 participants<br>45–84 years                     | FFQ                       | Positive loadings for fats and oils, processed meats, nondiet soda, potatoes, sweet breads, cheeses/cheese and cream sauce, sweet extras, beans, poultry, meal-replacement drinks, desserts; negative loadings for cruciferous vegetables, dark-yellow vegetables, soy foods and beverages, fish, other alcohol, other vegetables | CRP, fibrinogen, IL-6, homocysteine                     | CRP: 5.3%<br>IL-6: 4%<br>fibrinogen: 2.4%                      | CRP $\uparrow$ (0.228 <sup>b</sup> )<br>IL-6 $\uparrow$ (0.199 <sup>b</sup> )<br>fibrinogen $\uparrow$ (0.153 <sup>b</sup> )                                                                                                                              |
| Heidemann et al. (2005) <sup>25</sup>                             | Germany | 574 participants<br>35–65 years                       | FFQ                       | Positive loadings for fresh fruit; negative loadings for red meat, beer, poultry, legumes, high-caloric soft drinks, processed meat, and bread (except whole-grain bread)                                                                                                                                                         | HbA <sub>1c</sub> , HDL cholesterol, CRP, adiponectin   | CRP: 1.1%<br>adiponectin: 10.2%                                | Adiponectin $\uparrow$ (n.a.)<br>CRP $\leftrightarrow$ (n.a.)                                                                                                                                                                                             |
| Schulze et al. (2005) <sup>26</sup>                               | USA     | 1,350 women<br>43–69 years                            | FFQ                       | Positive loadings for sugar-sweetened soft drinks, refined grains, processed meat, diet soft drinks; negative loadings for wine, coffee, cruciferous vegetables, yellow vegetables                                                                                                                                                | sTNFR2, IL-6, CRP, E-selectin, sICAM-1, sVCAM-1         | n.a.                                                           | CRP $\uparrow$ (0.23 <sup>b</sup> )<br>sTNFR2 $\uparrow$ (0.12 <sup>b</sup> )<br>IL-6 $\uparrow$ (0.21 <sup>b</sup> )<br>E-selectin $\uparrow$ (0.26 <sup>b</sup> )<br>sICAM-1 $\uparrow$ (0.18 <sup>b</sup> )<br>sVCAM-1 $\uparrow$ (0.14 <sup>b</sup> ) |
| Cross-sectional analysis of patients with coronary artery disease |         |                                                       |                           |                                                                                                                                                                                                                                                                                                                                   |                                                         |                                                                |                                                                                                                                                                                                                                                           |
| Hoffmann et al. (2004) <sup>27</sup>                              | Germany | 455 women<br>(200 cases, 255 controls)<br>30–80 years | FFQ                       | Positive loadings for margarine, meat (except poultry), other vegetable fats and oils (except margarine and olive oil); negative loadings for vegetarian dishes, wine                                                                                                                                                             | HDL and LDL cholesterol, C-peptide, CRP, Lipoprotein(a) | CRP: 5.9%                                                      | CRP $\uparrow$ (n.a.)                                                                                                                                                                                                                                     |

<sup>a</sup> Spearman correlation coefficients.

<sup>b</sup> Pearson correlation coefficients.

Abbreviations: CRP, C-reactive protein; FFQ, food frequency questionnaire; HbA<sub>1c</sub>, hemoglobin A<sub>1c</sub>; HDL, high-density lipoprotein; IL, interleukin; LDL, low-density lipoprotein; PAI-1, plasminogen activator inhibitor 1; SBP, systolic blood pressure; sICAM-1, soluble intercellular adhesion molecule 1; sTNFR2, soluble tumor necrosis factor  $\alpha$  receptor 2; sVCAM-1, soluble vascular cell adhesion molecule 1.

**Table 2 Summary of cross-sectional studies investigating the associations between inflammatory biomarkers and a posteriori-defined dietary patterns.**

| Reference                                        | Country | No. and age of participants   | Dietary assessment method  | Dietary patterns identified       | Dietary pattern components                                                                                                                                                                                                                                                                                                                                                                                                                                                                                                                                                                                                                                                                                                                                                                                                                                                                                                                                                                                                                                                                                                                                                                                                                                                                                                                                                                                                                                                                                                                                                 | Positive(↑), inverse(↓), and no (-→) statistically significant associations                                    |
|--------------------------------------------------|---------|-------------------------------|----------------------------|-----------------------------------|----------------------------------------------------------------------------------------------------------------------------------------------------------------------------------------------------------------------------------------------------------------------------------------------------------------------------------------------------------------------------------------------------------------------------------------------------------------------------------------------------------------------------------------------------------------------------------------------------------------------------------------------------------------------------------------------------------------------------------------------------------------------------------------------------------------------------------------------------------------------------------------------------------------------------------------------------------------------------------------------------------------------------------------------------------------------------------------------------------------------------------------------------------------------------------------------------------------------------------------------------------------------------------------------------------------------------------------------------------------------------------------------------------------------------------------------------------------------------------------------------------------------------------------------------------------------------|----------------------------------------------------------------------------------------------------------------|
| PCA/FA or PLS<br>Guo et al. (2012) <sup>16</sup> | Japan   | 702 men<br>44.5 y (median)    | BDHQ                       | "Japanese"<br><br>"Sweets-fruits" | Green-leaf vegetables, cabbage, Japanese white radish, turnips, other root vegetables, carrot, pumpkin, seaweeds, potatoes, vegetable salad, mushrooms, soybean, pickled vegetables, tomato, pickles, fish, fermented soybeans, fruits, mayonnaise, miso soup, chicken egg, green tea, rice, squid, octopus, lobster, shellfish, citrus fruits<br>Ice cream, Western-style cake, cookie, biscuit, Japanese cake, rice cracker, rice cake, okonomiyaki, fruits, bread, citrus fruits, fruits, dairy products, 100% fruits or vegetables juice, cola; low in alcohol                                                                                                                                                                                                                                                                                                                                                                                                                                                                                                                                                                                                                                                                                                                                                                                                                                                                                                                                                                                                         | Adiponectin↑<br><br>Adiponectin↔→                                                                              |
| Villegas et al. (2012) <sup>31</sup>             | China   | 3,646 men<br>40–74 y          | FFQ                        | "Vegetable-based"                 | Squid, octopus, lobster, shellfish, noodles, buckwheat noodles, fish, pork, beef, ham, sausage, bacon and liver, fruits, noodles, Japanese cake, alcohol, citrus fruits, rice cracker, rice cake, okonomiyaki, mushrooms, black or oolong tea, chicken egg; low in rice                                                                                                                                                                                                                                                                                                                                                                                                                                                                                                                                                                                                                                                                                                                                                                                                                                                                                                                                                                                                                                                                                                                                                                                                                                                                                                    | Adiponectin↓                                                                                                   |
| Heidemann et al. (2011) <sup>28</sup>            | Germany | 4,025 participants<br>18–79 y | Dietary history instrument | "Fruit-based"<br><br>"Meat-based" | Green beans, yard long bean, wax gourd, cucumber, tomatoes, Chinese celery, wild rice stems, amaranth, Chinese chives, eggplant, potatoes, baby soya beans, garlic and garlic shoots, Chinese cabbage/bok choy cabbage, cauliflower, hyacinth beans/snow peas, garland chrysanthemum, asparagus lettuce, fresh red and green peppers, white turnips, luffa, clover, fresh mushrooms/ fresh xianggu mushrooms, spinach, greens/Chinese greens, green cabbage, bamboo shoots, shepherd's purse, onions, snow pea shoots, fresh peas, fried bean curd/vegetarian chicken/bean curd cake and other kinds of bean products, lotus roots, carrots, bean curd, soybean sprouts, fresh broad beans, mung bean sprouts, head of garlic, green onions                                                                                                                                                                                                                                                                                                                                                                                                                                                                                                                                                                                                                                                                                                                                                                                                                                | CRP↔→                                                                                                          |
| Meyer et al. (2011) <sup>22</sup>                | Germany | 981 men<br>45–64 y            | 7-day dietary record       | PCA pattern<br><br>PLS pattern    | Tangerines/oranges/ grapefruits, apples, watermelon, pears, grapes, peaches, bananas, other fruits, fresh milk, bread, shrimp/crab etc., tomatoes, all kind of desserts, mung bean/red beans and other dried beans, fresh mushrooms/fresh xianggu mushrooms, preserved fruits<br>Chicken, pig's feet, duck/goose, beef/lamb, organ meat, pig's ham hock, rice field eel or river eel, pork ribs, salt water fish, shrimp/crab etc., fried bean curd/vegetarian chicken/bean curd cake and other kinds of bean products, soybean sprouts, fresh pork, pig liver, mung bean sprouts, pork chops, conch, bean curd, fresh water fish<br>Refined grains, processed meat, red meat, high-sugar beverages, eggs, potatoes, beer, sweets and cakes, snacks, butter, other animal fats; low in fruits, whole grains, tea<br>Cruciferous vegetables, fruity and root vegetables, other vegetables, leafy vegetables, vegetable oils, legumes, fruits, fish, red meat, potatoes, whole grains, other animal fats, poultry, eggs<br>Beer, cooked sausage, meat (except poultry); low in fresh fruit, whole-meal bread, cooked vegetables, cheese, curd, sweet bread spread, fresh vegetables, tea, cereals and muesli, nuts, rice, potatoes, condensed milk and cream, vegetable oil<br>Beer, meat (except poultry), cooked sausage; low in fresh fruit, sweet bread spread, whole-meal bread, cooked vegetables, curd, cheese, fresh vegetables, tea, cereals and muesli, condensed milk and cream, cake and pastries, butter, nuts, chocolates, fruit and vegetable juice, potatoes | CRP↓<br><br>CRP↔→<br><br>Fibrinogen↔→<br><br>Fibrinogen↓<br><br>CRP↑, IL-6↑, IL-18↑<br><br>CRP↑, IL-6↑, IL-18↑ |

Table 2 Continued

| Reference                             | Country | No. and age of participants                                  | Dietary assessment method | Dietary patterns identified | Dietary pattern components                                                                                                                                                                                                                                                                                                                                  | Positive(↑), inverse(↓), and no (-) statistically significant associations |
|---------------------------------------|---------|--------------------------------------------------------------|---------------------------|-----------------------------|-------------------------------------------------------------------------------------------------------------------------------------------------------------------------------------------------------------------------------------------------------------------------------------------------------------------------------------------------------------|----------------------------------------------------------------------------|
| Nanri et al. (2011) <sup>29</sup>     | Japan   | 9,545 participants<br>40–69 y                                | Short FFQ                 | "Healthy"                   | Carrots; green leafy vegetables, other green/yellow vegetables, other vegetables, mushrooms, daikon, cabbage, potatoes, seaweed, pumpkin, burdock/bamboo shoot, broccoli, other fruit, citrus fruit, fish, bone-edible small fish, tofu products, tofu, fermented and unfermented soybean, miso soup, kiriboshi-daikon, stir-fried foods, yogurt, green tea | CRP ↓ (in men only)                                                        |
|                                       |         |                                                              |                           | "Western"                   | Deep-fried foods, stir-fried foods, mayonnaise, beef/pork, ham/sausage/salami/bacon, chicken, eggs, other vegetables, fish paste products, cabbage, coffee, liver, canned tuna, fish roe, carrots, other green/yellow vegetables, western confections, squid/octopus/shrimp/crab, mushrooms; low in yogurt, other fruit                                     | CRP ↔                                                                      |
|                                       |         |                                                              |                           | "Seafood"                   | Shellfish, squid/octopus/shrimp/crab, fish roe, bone-edible small fish, fermented and unfermented soybean, liver, fish, fish paste products, tofu products, noodles, pumpkin, yogurt, broccoli, miso soup, potatoes, canned tuna, tofu, chicken, kiriboshi-daikon, daikon, burdock/ bamboo shoot                                                            | CRP ↑ (in men only)                                                        |
| Nettleton et al. (2010) <sup>30</sup> | USA     | 1,101 participants<br>men: 71.8 y<br>women: 70.7 y<br>(mean) | FFQ                       | "Healthy"                   | Bread, margarine, noodles, coffee, milk, yogurt, butter; low in rice, miso soup, green tea                                                                                                                                                                                                                                                                  | CRP ↔                                                                      |
|                                       |         |                                                              |                           | "Dessert"                   | Japanese confections, Western confections, citrus fruit, other fruit, peanuts, milk, butter, bread, green tea, shellfish, squid/octopus/shrimp/crab, fish roe, fish paste products, tofu products, deep-fried foods; low in noodles                                                                                                                         | CRP ↓ (in men only)                                                        |
|                                       |         |                                                              |                           | "Healthy"                   | Dark yellow vegetables, other vegetables, cruciferous vegetables, green leafy vegetables, fruit, legumes, fin fish, tomatoes, whole grains, poultry, nuts and peanut butter, seafood, low-fat dairy, eggs, oils, white potatoes                                                                                                                             | CRP ↓                                                                      |
|                                       |         |                                                              |                           | "Western"                   | Processed meat, red meat, fried potatoes, refined grains, high-fat dairy, desserts, sugar-sweetened beverages, candy and added sweets, white potatoes, eggs, pizza, butter, regular coffee, nuts and peanut butter, added oils, fried fish, tomatoes                                                                                                        | CRP ↔                                                                      |
| Cassidy et al. (2009) <sup>17</sup>   | UK      | 1,754 women<br>18–80 y                                       | FFQ                       | "Fruit and vegetable"       | Green leafy vegetables, other vegetables, yellow vegetables, other fruit, vegetables & allium, cruciferous vegetables; low in fried potatoes                                                                                                                                                                                                                | Adiponectin ↔                                                              |
|                                       |         |                                                              |                           | "Traditional English"       | Cruciferous vegetables, meat, processed meats, legumes, savory pies, fried potatoes, fried fish                                                                                                                                                                                                                                                             | Adiponectin ↓                                                              |
|                                       |         |                                                              |                           | "Dieting"                   | Low-sugar soda, low-fat dairy products, lasagna; low in butter, sweets and sweet condiments, tea, sweet baked products                                                                                                                                                                                                                                      | Adiponectin ↑                                                              |
| Centritto et al. (2009) <sup>23</sup> | Italy   | 7,646 participants<br>≥35 y                                  | FFQ                       | "Olive oil and vegetables"  | Olive oil, cooked vegetables, raw vegetables, legumes, soups, fish, potatoes, fruits, bouillon, fresh cheese, white meat                                                                                                                                                                                                                                    | CRP ↓                                                                      |
|                                       |         |                                                              |                           | "Pasta and meat"            | Pasta/other grains, cooked tomatoes, red meat, animal fats, other sauces, wine, processed meat, bread, olive oil, beer; low in yogurt                                                                                                                                                                                                                       | CRP ↑                                                                      |
|                                       |         |                                                              |                           | "Eggs and sweets"           | Eggs, margarines, processed meat, sugar and sweets, vegetable oils, snacks, mayonnaises, butter, seasoned cheese, olive oil, fresh cheese, pizza, canned fish                                                                                                                                                                                               | CRP ↑                                                                      |



|                                         |        |                               |                    |                                                                            |                                                                                                                                                                                                                                                                                                                                                                                                                                                                                                                                                                                                                                                                                                                                                                                                                                                                                                                                                                                                                                                                                                                                                                                                                                                                                                                                                                                                                                                                                                                                                                                                                                                                                                                                                                                                                                                                                                                                                                                                                                                                                                                                                                                                                                                                                                                                                                                                                                                                                                                                                                                                                                                                                                                                                                                                                                                                                                                                        |                                                                                                                                                                                                                                                                         |
|-----------------------------------------|--------|-------------------------------|--------------------|----------------------------------------------------------------------------|----------------------------------------------------------------------------------------------------------------------------------------------------------------------------------------------------------------------------------------------------------------------------------------------------------------------------------------------------------------------------------------------------------------------------------------------------------------------------------------------------------------------------------------------------------------------------------------------------------------------------------------------------------------------------------------------------------------------------------------------------------------------------------------------------------------------------------------------------------------------------------------------------------------------------------------------------------------------------------------------------------------------------------------------------------------------------------------------------------------------------------------------------------------------------------------------------------------------------------------------------------------------------------------------------------------------------------------------------------------------------------------------------------------------------------------------------------------------------------------------------------------------------------------------------------------------------------------------------------------------------------------------------------------------------------------------------------------------------------------------------------------------------------------------------------------------------------------------------------------------------------------------------------------------------------------------------------------------------------------------------------------------------------------------------------------------------------------------------------------------------------------------------------------------------------------------------------------------------------------------------------------------------------------------------------------------------------------------------------------------------------------------------------------------------------------------------------------------------------------------------------------------------------------------------------------------------------------------------------------------------------------------------------------------------------------------------------------------------------------------------------------------------------------------------------------------------------------------------------------------------------------------------------------------------------------|-------------------------------------------------------------------------------------------------------------------------------------------------------------------------------------------------------------------------------------------------------------------------|
| Eilat-Adar et al. (2009) <sup>32</sup>  | USA    | 1,066 participants<br>18–92 y | FFQ                | “Traditional foods”<br><br>“Western foods”                                 | <p>Fish, native sea and land mammals, stew, mostly meat and stew mostly rice/noodles, native birds, wild greens, wild berries and native berry agutuk, native sea and land animal fats; low in candy bars and sugar syrup, store-bought non-hydrogenated vegetable fats, milk, cheese, ice cream and non-dairy creamer</p> <p>Store-bought meats and chicken, fatty meats, snack chips, pizza, French fries or fried potatoes, soda pop, stew with mostly rice/noodles, milk, cheese, ice cream, nondairy creamer; low in evaporated milk, store-bought hydrogenated vegetable fats, native sea and land animal fats, store-bought animal fats, pancakes, hot cereal</p> <p>Beans dry, dark bread, store-bought non-hydrogenated vegetable fats, peanut butter, store-bought fruits, vegetables and lettuce salad, hot cereal, milk, cheese, ice cream, non-dairy creamer; low in flavored drinks, soda pop, snack chips, pizza</p> <p>Coffee and tea, candy bars, sugar syrup, eggs, pancakes, native birds, stew with mostly meat, stew with mostly rice/noodles; low in store-bought fruits, vegetables and lettuce salad, white bread, pasta, rice, cold cereal, pilot bread, lower fat milk</p> <p>Green leafy vegetables, mushrooms, carrots, other green and yellow vegetables, other vegetables, seaweed, daikon, potatoes, other fruit, pumpkin, cabbage, citrus fruit, broccoli, burdock or bamboo shoot, bone-edible small fish, natto and soybean, tofu products, yogurt, fish, kiriboshi-daikon, tofu, Japanese confectioneries, miso soup, stir-fried foods</p> <p>Deep-fried food, beef or pork, stir-fried foods, mayonnaise, chicken, ham/sausage/bacon, cabbage, egg, other vegetables, fish-paste products, carrots, potatoes, other green and yellow vegetables, coffee, daikon, burdock or bamboo shoot, tofu products</p> <p>Squid or octopus and shrimp or crab, shellfish, fish roe, salted fish guts, tsukudani, fish-paste products, bone-edible small fish, fish, deep-fried foods, egg, tofu</p> <p>Bread, margarine, coffee, yogurt, ham/sausage/bacon, other fruit, Japanese confectioneries; low in rice, miso soup</p> <p>Whole-grain cereals, low-fat dairy; low in refined cereals (Only one or a few food groups included<sup>†</sup>)</p> <p>Fruits, other vegetables, tomatoes, poultry, legumes, cruciferous and green leafy vegetables, tea, fruit juices, whole grains, potatoes, low-fat dairy products, fish, yellow vegetables; low in butter, high-fat dairy products, hydrogenated fats</p> <p>Refined grains, red meat, butter, high-fat dairy products, processed meat, sweets and desserts, pizza, eggs, potatoes, hydrogenated fats, soft drinks, snacks, French fries, coffee, mayonnaise, fruit juices, vegetable oils; low in low-fat-dairy products, other vegetables, fruits, fish</p> <p>Refined grains, potatoes, tea, whole grains, hydrogenated fats, legumes, casserole</p> | CRP↔, fibrinogen↔<br><br>CRP↔, fibrinogen↔<br><br>CRP↔, fibrinogen↓<br><br>CRP↓, fibrinogen↔<br><br>CRP↓                                                                                                                                                                |
| Nanri et al. (2008) <sup>33</sup>       | Japan  | 7,802 participants<br>50–74 y | FFQ                | “Healthy”                                                                  |                                                                                                                                                                                                                                                                                                                                                                                                                                                                                                                                                                                                                                                                                                                                                                                                                                                                                                                                                                                                                                                                                                                                                                                                                                                                                                                                                                                                                                                                                                                                                                                                                                                                                                                                                                                                                                                                                                                                                                                                                                                                                                                                                                                                                                                                                                                                                                                                                                                                                                                                                                                                                                                                                                                                                                                                                                                                                                                                        | CRP↔                                                                                                                                                                                                                                                                    |
| Yannakoulia et al. (2008) <sup>34</sup> | Greece | 196 women<br>18–84 y          | 3-day food records | “High-fat”                                                                 |                                                                                                                                                                                                                                                                                                                                                                                                                                                                                                                                                                                                                                                                                                                                                                                                                                                                                                                                                                                                                                                                                                                                                                                                                                                                                                                                                                                                                                                                                                                                                                                                                                                                                                                                                                                                                                                                                                                                                                                                                                                                                                                                                                                                                                                                                                                                                                                                                                                                                                                                                                                                                                                                                                                                                                                                                                                                                                                                        | CRP↔                                                                                                                                                                                                                                                                    |
| Esmailzadeh et al. (2007) <sup>35</sup> | Iran   | 486 women<br>40–60 y          | FFQ                | “Seafood”<br><br>“Westernized breakfast”<br>PC1<br>(PC2-PC10)<br>“Healthy” |                                                                                                                                                                                                                                                                                                                                                                                                                                                                                                                                                                                                                                                                                                                                                                                                                                                                                                                                                                                                                                                                                                                                                                                                                                                                                                                                                                                                                                                                                                                                                                                                                                                                                                                                                                                                                                                                                                                                                                                                                                                                                                                                                                                                                                                                                                                                                                                                                                                                                                                                                                                                                                                                                                                                                                                                                                                                                                                                        | CRP↔<br><br>CRP↔<br><br>Adiponectin↑<br>(Adiponectin↔)<br>CRP↓, VCAM-1↓, IL-6↔,<br>E-selctin↔,<br>ICAM-1↔, TNF-α↔,<br>SAA↔<br><br>IL-6↑, SAA↑, CRP↔,<br>VCAM-1↔,<br>E-selctin↔,<br>ICAM-1↔, TNF-α↔<br><br>IL-6↑, CRP↔, SAA↔,<br>VCAM-1↔, ICAM-1↔,<br>E-selctin↔, TNF-α↔ |
|                                         |        |                               |                    | “Western”<br><br>“Traditional”                                             |                                                                                                                                                                                                                                                                                                                                                                                                                                                                                                                                                                                                                                                                                                                                                                                                                                                                                                                                                                                                                                                                                                                                                                                                                                                                                                                                                                                                                                                                                                                                                                                                                                                                                                                                                                                                                                                                                                                                                                                                                                                                                                                                                                                                                                                                                                                                                                                                                                                                                                                                                                                                                                                                                                                                                                                                                                                                                                                                        |                                                                                                                                                                                                                                                                         |

Table 2 Continued

| Reference                                       | Country | No. and age of participants                               | Dietary assessment method | Dietary patterns identified                                                                                             | Dietary pattern components                                                                                                                                                                                                                                                                                                                                                                                                                                                                                                                                                                                                                                                                                                                                                                                                                                                                       | Positive(↑), inverse(↓), and no (↔) statistically significant associations                                                                                 |
|-------------------------------------------------|---------|-----------------------------------------------------------|---------------------------|-------------------------------------------------------------------------------------------------------------------------|--------------------------------------------------------------------------------------------------------------------------------------------------------------------------------------------------------------------------------------------------------------------------------------------------------------------------------------------------------------------------------------------------------------------------------------------------------------------------------------------------------------------------------------------------------------------------------------------------------------------------------------------------------------------------------------------------------------------------------------------------------------------------------------------------------------------------------------------------------------------------------------------------|------------------------------------------------------------------------------------------------------------------------------------------------------------|
| Mikkilä et al. (2007) <sup>36</sup>             | Finland | 1,037 participants<br>24–39 y                             | 48-h recall               | "Traditional"                                                                                                           | Rye, butter, milk, coffee, sausages, margarines and oil, potatoes, wheat, eggs, pork, other meat, alcoholic beverages; low in tea, other dairy products, fruit and berries, legumes and nuts, sugars and confectionery, other vegetables                                                                                                                                                                                                                                                                                                                                                                                                                                                                                                                                                                                                                                                         | CRP ↔                                                                                                                                                      |
| Pierce <sup>a</sup> et al. (2007) <sup>37</sup> | USA     | 219 Nisei<br>69.8 y (mean)<br>277 Sansei<br>41.8 y (mean) | Short FFQ                 | "Japanese food factor"<br>"Western food factor"                                                                         | Other vegetables, tea, cheese, alcoholic beverages, fruit and berries, rye, fish and shellfish, legumes and nuts, root vegetables; low in milk, coffee, potatoes, sugars and confectionery                                                                                                                                                                                                                                                                                                                                                                                                                                                                                                                                                                                                                                                                                                       | CRP ↔                                                                                                                                                      |
| Nettleton et al. (2006) <sup>38</sup>           | USA     | 5,089 participants<br>45–84 y                             | FFQ                       | "Fats and processed meats"<br>"Vegetables and fish"<br>"Beans, tomatoes and refined grains"<br>"Whole grains and fruit" | Fish, rice, Tsukemono, tofu, soy sauce<br>Cheese, meat (beef or pork and poultry), snacks, soda<br>Fats and oils, high-fat and processed meats, fried potatoes, salty snacks, desserts, high-fat cheeses/cheese and cream sauces, red meat, pizza, pasta and potato salads, sweet breads, ice cream, vegetables/potatoes, poultry, nondiet soft drinks, sweet extras, eggs and omelets, chicken/tuna/egg salads, coffee, cream soups/chowders, refined grain bread/ rice/pasta, coffee and tea creamer<br>Dark-yellow vegetables, cruciferous vegetables, other vegetables, fish, other soups, red meat, high-fat Chinese dishes, poultry, soy foods and beverages, refined-grain bread/ rice/pasta, tea; low in coffee<br>Beans, tomatoes, refined-grain bread/rice/pasta, high-fat cheeses/cheese/cream sauces, avocados and guacamole, red meat, poultry, high-fat Chinese dishes, whole milk | CRP ↔<br>CRP ↔<br>CRP ↔, IL-6 ↔,<br>E-selectin ↔,<br>ICAM-1 ↔<br>CRP ↔, IL-6 ↔,<br>E-selectin ↔,<br>ICAM-1 ↔                                               |
| Lopez-Garcia et al. (2004) <sup>39</sup>        | USA     | 732 women<br>43–69 y                                      | FFQ                       | "Prudent"<br>"Western"                                                                                                  | Whole-grain bread/rice/pasta, fruit, seeds/nuts/peanut butter, green leafy vegetables, low-fat milk, cottage and ricotta cheese, pasta and potato salads, chicken/tuna/egg salads, low-fat dairy desserts, other vegetables, tomatoes, fruit juices, yogurt, dark-yellow vegetables<br>Other vegetables, green, leafy vegetables, dark-yellow vegetables, cruciferous vegetables, fruit, tomatoes, legumes, fish and other seafood, poultry, whole grains, salad dressings, low-fat dairy products, fruit juices<br>Red meats, processed meats, refined grains, sweets and desserts, French fries, high-fat dairy products, potatoes, condiments, eggs, pizza, sugar-containing beverages, mayonnaise and other creamy salad dressings, margarine, cream soup, snacks, butter, nuts                                                                                                              | CRP ↓, IL-6 ↔,<br>E-selectin ↔,<br>ICAM-1 ↔<br>CRP ↓, E-selectin ↓, IL-6 ↔,<br>ICAM-1 ↔, VCAM-1 ↔<br>CRP ↑, E-selectin ↑,<br>ICAM-1 ↑, VCAM-1 ↑,<br>IL-6 ↔ |



|                                                          |        |                                  |                                                                                    |                                                                                                                                                                                                |                                                                                                                                                                                                                                                                                                                                                                                                                                                                                                                                                                                                                                                                                                                                                                                                                                                                                                                                                                                                                                                                                                                                                                                                                                                         |                                                                              |
|----------------------------------------------------------|--------|----------------------------------|------------------------------------------------------------------------------------|------------------------------------------------------------------------------------------------------------------------------------------------------------------------------------------------|---------------------------------------------------------------------------------------------------------------------------------------------------------------------------------------------------------------------------------------------------------------------------------------------------------------------------------------------------------------------------------------------------------------------------------------------------------------------------------------------------------------------------------------------------------------------------------------------------------------------------------------------------------------------------------------------------------------------------------------------------------------------------------------------------------------------------------------------------------------------------------------------------------------------------------------------------------------------------------------------------------------------------------------------------------------------------------------------------------------------------------------------------------------------------------------------------------------------------------------------------------|------------------------------------------------------------------------------|
| Fung et al. (2001) <sup>30</sup>                         | USA    | 466 men<br>40–75 y               | FFQ                                                                                | "Prudent"<br><br>"Western"                                                                                                                                                                     | Other vegetables, leafy vegetables, yellow and orange vegetables, cruciferous vegetables, legumes, tomatoes, fruit, fish, olive oil, garlic, fruit juices, poultry, water, refined grains, salad dressings<br><br>Red meats, processed meats; French fries, eggs, high-fat dairy products; butter, coffee, beer, added salt, mayonnaise, refined grains, cream soups, desserts, liquor, pizza; low in fruits, breakfast cereals, whole grains                                                                                                                                                                                                                                                                                                                                                                                                                                                                                                                                                                                                                                                                                                                                                                                                           | CRP↔, fibrinogen↔<br><br>CRP↔, fibrinogen↔                                   |
| Cluster analysis<br>Anderson et al. (2011) <sup>40</sup> | USA    | 1,751<br>participants<br>70–79 y | FFQ                                                                                | "Healthy foods"<br><br>"Breakfast<br>cereal"<br>"Meat and<br>alcohol"<br><br>"Sweets and<br>dessert"                                                                                           | Low-fat dairy products; fruit, whole grains, rice, pasta and mixed dishes, poultry, fish and other seafood, other vegetables, dark yellow vegetables, dark green vegetables; lowest intakes of beer, fried poultry, high-calorie drinks, processed meat, meat, high-fat dairy products, miscellaneous fats<br><br>Other cold breakfast cereal, cold breakfast cereal-fiber/bran; lowest intakes of snacks, rice, pasta and mixed dishes, refined grains<br><br>Beer, meat, processed meat, liquor, fried poultry; lowest intakes of dark yellow vegetables, cold breakfast cereal-fiber/bran, other vegetables, fish and other seafood, poultry, whole grains, nuts, fruit, other cold breakfast cereal, sweets and desserts<br><br>Sweets and desserts; lowest intakes of dark green vegetables, liquor                                                                                                                                                                                                                                                                                                                                                                                                                                                | CRP↔, IL-6↔, TNF-α↔<br><br>CRP↔, IL-6↔, TNF-α↔<br><br>IL-6↑, CRP↔, TNF-α↔    |
| Hlebowicz et al. (2011) <sup>41</sup>                    | Sweden | 4,999<br>participants<br>45–73 y | 7-day menu<br>book, diet<br>history<br>questionnaire<br>and 1-1-<br>h<br>interview | "Refined grains"<br>"High-fat dairy<br>products"<br>"Many foods<br>and drinks"<br>"Fiber bread"<br><br>"Low fat and<br>high fiber"<br>"White bread"<br><br>"Milk fat"<br>"Sweets and<br>cakes" | Refined grains; lowest intakes of mayonnaise and salad dressing<br><br>High-fat dairy products, miscellaneous fats, mayonnaise and salad dressing, nuts, high-calorie drinks, snacks; lowest intakes of low-fat dairy products<br><br>Cheese, high-fat meats, cake/pastry, fruits, white bread, sweets, low-fat meats, boiled potatoes, medium-fat spread, low-fat milk, whole milk, low-fat spread, fiber bread<br><br>Fiber-rich bread, high-fat meats, sweets, fruits, low-fat meats, low-fat spread, cheese, boiled potatoes, low-fat milk, cake/pastry, vegetables<br><br>Fruits, low-fat milk, high-fat meats, low-fat meats, sweets, vegetables, boiled potatoes, cake/pastry, fiber bread, white bread, fiber crisp-bread, low-fat spread, cereals, cheese<br><br>White bread, high-fat meats, sweets, low-fat spread, low-fat meats, cheese, fruits, boiled potatoes, cake/pastry, low-fat milk, whole milk, medium-fat spread<br><br>Bregott spread, sweets, white bread, high-fat meats, cheese, whole milk, low-fat meats, cake/pastry, fruits, boiled potatoes, fiber bread<br><br>Sweets, high-fat meats, white bread, fruits, cake/pastry, cheese, low-fat meats, whole milk, low-fat milk, low-fat spread, boiled potatoes, fiber bread | CRP↔<br><br>CRP↔<br><br>CRP↔<br><br>CRP↔<br><br>CRP↔<br><br>CRP↔<br><br>CRP↔ |

Table 2 Continued

| Reference                            | Country  | No. and age of participants | Dietary assessment method | Dietary patterns identified                                                                                                                                                                | Dietary pattern components                                                                                                                                                                                                                                                                                                                                                                                                                                                                                                                                                                                                                                                                                                    | Positive( <sup>†</sup> ), inverse( <sup>‡</sup> ), and no ( <sup>↔</sup> ) statistically significant associations                                              |
|--------------------------------------|----------|-----------------------------|---------------------------|--------------------------------------------------------------------------------------------------------------------------------------------------------------------------------------------|-------------------------------------------------------------------------------------------------------------------------------------------------------------------------------------------------------------------------------------------------------------------------------------------------------------------------------------------------------------------------------------------------------------------------------------------------------------------------------------------------------------------------------------------------------------------------------------------------------------------------------------------------------------------------------------------------------------------------------|----------------------------------------------------------------------------------------------------------------------------------------------------------------|
| Multivariate finite mixture model    |          |                             |                           |                                                                                                                                                                                            |                                                                                                                                                                                                                                                                                                                                                                                                                                                                                                                                                                                                                                                                                                                               |                                                                                                                                                                |
| Oliveira et al. (2011) <sup>42</sup> | Portugal | 925 participants<br>≥18 y   | FFQ                       | Women<br>"Healthy"<br>"Low fruit and vegetable"<br>"Red meat and alcohol"<br>"In transition to fast food"<br>Men<br>"Healthy"<br>"Fish"<br>"Red meat and alcohol"<br>"Intermediate intake" | Highest consumption of vegetables, vegetable soup, fruits, dairy products; lowest consumption of red meat, fast foods, soft drinks<br>Lowest intake of fruit and vegetables<br>Highest intake of red meat and alcoholic beverages; lowest intake of dairy products, vegetable soup<br>Highest intake of white meat, sweets, fast foods<br>Highest consumption of vegetable soup, fruits, dairy products, cereals; lowest intake of red meat, fast food, alcoholic beverages<br>Highest intake of fish<br>Highest consumption of red meat, alcoholic beverages, fast foods, lowest intake of fruits, vegetable soup, dairy products, cereals<br>Intermediate consumption of most food groups; lowest consumption of white meat | Reference pattern<br>CRP <sup>↔</sup><br>CRP <sup>↔</sup><br>CRP <sup>↔</sup><br>Reference pattern<br>CRP <sup>↔</sup><br>CRP <sup>↑</sup><br>CRP <sup>↔</sup> |

<sup>a</sup> PC2: high in vegetables, fruit, and olive oil; PC3: high in coffee and low-fat dairy; PC4: high in full-fat dairy products; PC5: high in poultry and low in red meat and its products; PC6: high in fish and low in red meat and its products; PC7: high consumption of alcoholic beverages; PC8: high in nuts and low in fruits; PC9: high in legumes; PC10: high in potatoes.

<sup>b</sup> Confirmatory factor analysis, the authors hypothesized two dietary patterns based on studies of Japanese Americans and native Japanese persons living in Japan, CFA was used to test the hypothesis. Abbreviations: BDHQ, brief, self-administered diet history questionnaire; CRP, C-reactive protein; FA, factor analysis; FFQ, food frequency questionnaire; ICAM-1, intercellular adhesion molecule 1; IL, interleukin; PC, principal component; PCA, principal component analysis; PLS, partial least squares; SAA, serum amyloid A; TNF- $\alpha$ , tumor necrosis factor  $\alpha$ ; VCAM-1, vascular cell adhesion molecule 1.

linked with CRP. Positive factor loadings revealed food groups that were positively associated with the identified pattern. Dietary patterns positively associated with biomarker levels were largely characterized by positive loadings of red meat, processed meat, and beer<sup>22,23,38,39</sup>; one of these patterns also showed negative loadings of fruit, vegetables, and whole-grain products.<sup>22</sup> Patterns inversely associated with CRP concentrations were characterized by high loadings of fruit and vegetables, whole grains, or fish.<sup>23,29–31,33,35,38,39</sup> However, one study<sup>29</sup> performed in Japan found a pattern characterized by high loadings of fish and fish products that was positively associated with CRP levels in men. Two other studies, by Eilat-Adar et al.<sup>32</sup> and Nanri et al.,<sup>29</sup> found that high loadings of sweets, desserts, and refined grains were inversely associated with CRP. Four studies additionally reported on IL-6<sup>22,35,38,39</sup> or IL-18,<sup>22</sup> and two of these found positive associations with patterns high in red and processed meat and low in vegetables and fruits.<sup>22,35</sup> No inverse associations were observed. Fibrinogen<sup>20,28,32</sup> and adhesion molecules (such as E-selectin, ICAM-1, or VCAM-1)<sup>35,38,39</sup> were rarely investigated, but when they were, patterns high in vegetables, fruits, and whole grains showed inverse associations<sup>28,32</sup> and no positive associations were found. Regarding the anti-inflammatory biomarker adiponectin, positive associations were found for vegetable-, fruit-, and fish-based patterns,<sup>16</sup> low-sugar and low-fat dairy diets,<sup>17</sup> and whole-grain-based diets.<sup>34</sup> Inverse associations were reported for patterns somewhat more meat/processed meat- and (fried) fish-based.<sup>16,17</sup>

Of three analyses applying cluster analysis<sup>40,41</sup> or the similar multivariate finite mixture model<sup>42</sup> (Table 2), two found positive associations between “sweet and dessert” dietary patterns, a “high-fat dairy product” pattern, and a “red meat and alcohol” pattern and IL-6<sup>40</sup> or CRP levels.<sup>42</sup>

### Dietary indices and scores

Studies of the associations between *a priori* dietary patterns and inflammatory biomarkers are summarized in Table 3. Three intervention studies applied the Mediterranean diet,<sup>21,43,44</sup> and almost all biomarkers of inflammation, especially CRP, were lower and adiponectin concentrations were higher after those interventions.

Among the cross-sectional studies investigating *a priori* dietary patterns (Table 3),<sup>19,45–61</sup> 10 used the Mediterranean Diet Score (MDS),<sup>19,45,46,48,49,53,57,59–61</sup> one used an alternative to the original MDS score,<sup>55</sup> seven investigated the Healthy Eating Index (HEI)<sup>47,52,54–56,58</sup> or an alternative HEI,<sup>50,55</sup> and five used other indices. Seventeen studies reported statistically significant associations with biomarkers of low-grade chronic inflammation. Positive associations were reported between the different healthy *a priori* patterns and the anti-inflammatory markers adi-

ponectin<sup>19,50</sup> and IL-10.<sup>45</sup> Ten studies reported inverse associations for CRP levels and dietary indices that were almost all MDS/alternative MDS or HEI/alternative HEI.<sup>46,50,51,53–59</sup> Inverse associations were also reported for several interleukins,<sup>48,49,51,55,57,59</sup> fibrinogen,<sup>46,51,53,56,57</sup> E-selectin,<sup>50,55</sup> ICAM-1 and VCAM-1,<sup>55</sup> and TNF- $\alpha$ .<sup>45</sup>

## DISCUSSION

This is believed to be the first systematic review of the associations between dietary patterns and biomarkers of inflammation. While numerous studies were identified, no prospective observational study investigating dietary patterns and changes in biomarkers of inflammation was found. Overall, the dietary patterns identified by RRR were almost all meat-based patterns and nearly all of them were statistically significantly associated with biomarkers such as CRP, IL-6, and fibrinogen. After taking into account the inconsistencies of results, which were generated using different methods of identifying dietary patterns, the current work showed some evidence to support the hypothesis that Western-like or meat-based patterns are positively associated with low-grade inflammation. Additionally, vegetable- and fruit-based patterns and *a priori* healthy dietary patterns appeared to be inversely related to inflammatory biomarkers; this was particularly well supported by intervention studies investigating the Mediterranean diet.

### *A posteriori* dietary patterns analysis

The inconsistency of the statistically significant associations across studies could be due to the data-driven nature of *a posteriori* dietary pattern analysis, which depends strongly on the dietary behavior and the culture of the study population.<sup>15</sup> Thus, dietary patterns across populations differ in their compositions and in the weightings of food groups. In addition, the method used to identify the dietary patterns may affect the magnitude of outcomes. For example, RRR analysis creates combinations of food groups that maximize the variance in the selected biomarkers.<sup>14</sup> Consequently, the dietary patterns generated with RRR were statistically significantly associated with almost all biomarkers of inflammation.<sup>18,22–26</sup> In one study that did not report statistically significant associations, the authors chose hemoglobin A1c, high-density lipoprotein cholesterol, CRP, and adiponectin as response variables, which resulted in a pattern that did not explain much variance in CRP concentrations (1.1%).<sup>25</sup> This could explain the lack of statistical significance in that study.

Where provided, the Pearson correlation coefficients for CRP were 0.228<sup>18</sup> and 0.23,<sup>26</sup> and the Spearman

**Table 3 Summary of studies investigating the associations between inflammatory biomarkers and dietary scores or indices.**

| Reference                                                                    | Country                                | No. and age of participants    | Dietary assessment method                    | Dietary score/index                                                                                          | Positive (↑), inverse (↓), and no (↔) statistically significant associations           |
|------------------------------------------------------------------------------|----------------------------------------|--------------------------------|----------------------------------------------|--------------------------------------------------------------------------------------------------------------|----------------------------------------------------------------------------------------|
| <b>Interventional studies</b>                                                |                                        |                                |                                              |                                                                                                              |                                                                                        |
| Bliher et al. (2012) <sup>43</sup>                                           | Israel                                 | 109 participants<br>40–65 y    | FFQ, 24-h dietary recall (subgroup)          | Mediterranean Diet (2-y intervention)                                                                        | Adiponectin↑<br>CRP↓<br>MCP-1↓ <sup>a</sup><br>P-selectin↓<br>CRP↓<br>MCP-1↔           |
| Konstantinidou et al. (2010) <sup>44</sup>                                   | Spain                                  | 60 participants<br>20–50 y     | FFQ                                          | Mediterranean Diet (3-mo. intervention)                                                                      | CRP↓<br>IL-6↓<br>IL-7↓<br>IL-18↓                                                       |
| <b>Interventional studies investigating patients with metabolic syndrome</b> |                                        |                                |                                              |                                                                                                              |                                                                                        |
| Esposito et al. (2004) <sup>21</sup>                                         | Italy                                  | 90 patients<br>44.3 y (mean)   | 3-day food record                            | Mediterranean-Style Diet (2-y intervention)                                                                  | CRP↔<br>IL-6↔<br>IL-7↔<br>IL-18↓                                                       |
| <b>Cross-sectional studies</b>                                               |                                        |                                |                                              |                                                                                                              |                                                                                        |
| Azzini et al. (2011) <sup>45</sup>                                           | Italy                                  | 131 participants<br>20–40 y    | Dietary diary (4 days including the weekend) | Mediterranean Diet Score                                                                                     | IL-10↑<br>TNF-α↓                                                                       |
| Carter et al. (2010) <sup>46</sup>                                           | USA                                    | 13,197 participants<br>18–90 y | FFQ, 24-h dietary recall                     | Mediterranean Diet Score                                                                                     | CRP↓ <sup>b</sup><br>Fibrinogen↓ <sup>b</sup>                                          |
| Fragopoulou et al. (2010) <sup>19</sup>                                      | Greece                                 | 3,042 participants<br>18–89 y  | FFQ                                          | Mediterranean Diet Score                                                                                     | Adiponectin↑                                                                           |
| Shahar et al. (2009) <sup>47</sup>                                           | USA                                    | 298 participants<br>70–79 y    | FFQ                                          | Healthy Eating Index                                                                                         | CRP↔<br>IL-6↔                                                                          |
| Dai et al. (2008) <sup>48</sup>                                              | Vietnam                                | 345 men<br>about 54 y (mean)   | FFQ                                          | Mediterranean Diet Score                                                                                     | IL-6↓<br>CRP↔                                                                          |
| Dedoussis et al. (2008) <sup>49</sup>                                        | France, Greece, Italy, Poland, Germany | 957 participants<br>>60 y      | FFQ                                          | Mediterranean Diet Score                                                                                     | IL-8↓ <sup>c</sup><br>IL-6↔<br>TNF-α↔                                                  |
| Fargnoli et al. (2008) <sup>50</sup>                                         | USA                                    | 1,922 women<br>30–55 y         | FFQ                                          | Alternate Healthy Eating Index                                                                               | MCP-1↔<br>Adiponectin↑<br>CRP↓<br>E-selectin↓<br>IL-6↔<br>ICAM-1↔<br>VCAM-1↔<br>TNF-α↔ |
| Nettleton et al. (2008) <sup>51</sup>                                        | USA                                    | 5,042 participants<br>45–84 y  | FFQ                                          | Comprehensive Healthy Dietary Pattern (47 food groups)<br>Simplified Healthy Dietary Pattern (6 food groups) | CRP↓<br>IL-6↓<br>Fibrinogen↓<br>CRP↓<br>IL-6↔<br>Fibrinogen↔                           |

|                                          |        |                              |                         |                                    |                                                                                                                                                                                                                                                                                                                                                                                                                              |
|------------------------------------------|--------|------------------------------|-------------------------|------------------------------------|------------------------------------------------------------------------------------------------------------------------------------------------------------------------------------------------------------------------------------------------------------------------------------------------------------------------------------------------------------------------------------------------------------------------------|
| Boynton et al. (2007) <sup>52</sup>      | USA    | 110 women<br>51–75 y         | FFQ                     | Diet Quality Index                 | CRP↔<br>IL-6↔<br>SAA↔<br>CRP↔<br>IL-6↔<br>SAA↔<br>CRP↔<br>IL-6↔<br>SAA↔<br>CRP↓<br>Fibrinogen↓<br>CRP↓<br>CRP↓ (women only)<br>CRP↔ (men only)<br>CRP↔<br>IL-6↔<br>E-selectin↔<br>ICAM-1↔<br>VCAM-1↔<br>CRP↓<br>IL-6↓<br>E-selectin↓<br>ICAM-1↓<br>VCAM-1↔<br>CRP↔<br>IL-6↔<br>E-selectin↔<br>ICAM-1↔<br>VCAM-1↔<br>E-selectin↓<br>CRP↔<br>IL-6↔<br>ICAM-1↔<br>VCAM-1↔<br>CRP↓<br>IL-6↓<br>E-selectin↓<br>VCAM-1↓<br>ICAM-1↔ |
| Panagiotakos et al. (2006) <sup>53</sup> | Greece | 3,042 participants<br>>18 y  | FFQ                     | Mediterranean Diet Score           |                                                                                                                                                                                                                                                                                                                                                                                                                              |
| Ford et al. (2005) <sup>54</sup>         | USA    | 13,811 participants<br>≥20 y | Single 24-h recall, FFQ | Healthy Eating Index               |                                                                                                                                                                                                                                                                                                                                                                                                                              |
| Fung et al. (2005) <sup>55</sup>         | USA    | 660 women<br>43–69 y         | FFQ                     | Healthy Eating Index               |                                                                                                                                                                                                                                                                                                                                                                                                                              |
|                                          |        |                              |                         | Alternate Healthy Eating Index     |                                                                                                                                                                                                                                                                                                                                                                                                                              |
|                                          |        |                              |                         | Diet Quality Index Revised         |                                                                                                                                                                                                                                                                                                                                                                                                                              |
|                                          |        |                              |                         | Recommended Food Score             |                                                                                                                                                                                                                                                                                                                                                                                                                              |
|                                          |        |                              |                         | Alternate Mediterranean Diet Score |                                                                                                                                                                                                                                                                                                                                                                                                                              |

Table 3 Continued

| Reference                                                                                               | Country | No. and age of participants                                   | Dietary assessment method  | Dietary score/index                                                                                   | Positive (↑), inverse (↓), and no (↔) statistically significant associations                                        |
|---------------------------------------------------------------------------------------------------------|---------|---------------------------------------------------------------|----------------------------|-------------------------------------------------------------------------------------------------------|---------------------------------------------------------------------------------------------------------------------|
| Kant et al. (2005) <sup>56</sup>                                                                        | USA     | 8,719 participants<br>≥20 y                                   | 24-h recall                | Healthy Eating Index                                                                                  | CRP↓<br>Fibrinogen↔<br>CRP↓<br>Fibrinogen↓<br>CRP↓<br>Fibrinogen↔<br>CRP↓<br>IL-6↓<br>Fibrinogen↓<br>TNF-α↔<br>SAA↔ |
| Chrysohoou et al. (2004) <sup>57</sup>                                                                  | Greece  | 3,042 participants<br>18–89 y                                 | FFQ                        | Recommended Foods Score<br>Dietary Diversity Score for Recommended Foods<br>Mediterranean Diet Scores | CRP↓<br>Fibrinogen↓<br>CRP↓<br>IL-6↓<br>Fibrinogen↓<br>TNF-α↔<br>SAA↔                                               |
| Cross-sectional studies investigating patients with CVD or cancer<br>George et al. (2010) <sup>58</sup> | USA     | 746 breast cancer survivors<br>>18 y                          | FFQ                        | Healthy Eating Index (2005)                                                                           | CRP↓<br>SAA↔<br>Adiponectin↔<br>CRP↓<br>IL-6↓<br>Fibrinogen↔                                                        |
| Panagiotakos et al. (2009) <sup>59</sup>                                                                | Europe  | 1,003 myocardial infarction survivors<br>35–80 y              | FFQ                        | Mediterranean dietary pattern                                                                         | CRP↓<br>IL-6↓<br>Fibrinogen↔                                                                                        |
| Salas-Salvadó et al. (2008) <sup>60</sup>                                                               | Spain   | 772 participants at high risk for CVD <sup>d</sup><br>55–80 y | FFQ, 14-item questionnaire | Mediterranean-type food pattern                                                                       | CRP↔<br>IL-6↔<br>VCAM-1↔<br>VCAM-1↔<br>Adiponectin↔                                                                 |
| Mantzoros et al. (2006) <sup>61</sup>                                                                   | USA     | 987 diabetic women<br>30–55 y                                 | FFQ                        | Mediterranean dietary pattern score                                                                   | CRP↔<br>IL-6↔<br>VCAM-1↔<br>Adiponectin↔                                                                            |

<sup>a</sup> MCP-1 concentration decreased only after 6-month intervention; after 24-month intervention, MCP-1 level returned to baseline concentration.

<sup>b</sup> Significant association found only in males aged ≥45 years.

<sup>c</sup> Significant association found only in male participants and in Greek participants.

<sup>d</sup> Inclusion criteria: type 2 diabetes or three or more CHD risk factors. Exclusion criteria: previous history of CVD, any severe chronic illness, drug or alcohol abuse, history of allergy or intolerance to olive oil or nuts.

Abbreviations: CRP, C-reactive protein; FFQ, food frequency questionnaire; ICAM-1, intercellular adhesion molecule 1; IL, interleukin; MCP-1, monocyte chemoattractant protein-1; SAA, serum amyloid A; VCAM-1, vascular cell adhesion molecule 1.



correlation coefficient was 0.33.<sup>22</sup> The mean differences between the highest and lowest quintiles of dietary patterns ranged from 0.09 mg/L in a large study population of 7,646<sup>23</sup> to 1.31 mg/L in a study sample of 5,089 participants.<sup>18</sup> Although not statistically significant, Heidemann et al.<sup>25</sup> found a meaningful difference of 0.96 mg/L in a smaller study population of 574 participants.

In contrast to RRR, PCA identifies dietary patterns that explain as much variance as possible in the food groups.<sup>13</sup> Nevertheless, PCA has some limitations related to subjectivity at several steps of the analysis, which may influence the structure of the dietary patterns identified.<sup>62</sup> For example, the choice and the number of food groups may affect the composition of the generated patterns.<sup>15</sup> This was demonstrated by McCann et al.,<sup>63</sup> who investigated the effect of food classification on PCA-generated dietary patterns and ascertained that the misclassification of participants between patterns generated on the basis of 36 and 168 food groups was relatively high (41% of participants were misclassified as having a healthy pattern score). Thus, as the number of food items included in an analysis decreases, the explained variance in food intake increases, and the estimation of disease risk may decrease as well. Therefore, the number of food groups should not be set too low. The method of food grouping may also influence the dietary patterns identified for a population,<sup>15</sup> so reducing the number of food items and limiting the other food groups included in the analysis may result in less differentiated dietary patterns. For example, if white bread, pasta, rice, cold cereal, and bread are categorized as one broad food group, it will be unclear which of those foods mainly contributes to an identified dietary pattern.<sup>32</sup>

The rarely applied cluster analysis (or multivariate finite mixture model) was found to identify dietary patterns that predominantly showed no associations with higher or lower CRP levels.<sup>40–42</sup> These methods group individuals according to similarities in their dietary behavior. Within each cluster, intake levels of all investigated food groups and biomarker levels are reported as arithmetic means.<sup>13</sup> These results probably have less power to ascertain associations with health outcomes compared to continuous score variables, as calculated with PCA and RRR.<sup>15</sup>

### Dietary indices and scores

Following this review's initial assumption that *a posteriori* patterns are difficult to compare, using indices or scores should be advantageous. Regarding CRP, nearly three-quarters of the studies using healthy dietary indices or scores found inverse associations and the MDS seemed to be more strongly inversely associated with CRP levels than the HEI. The latter is based on the Dietary Guide-

lines for Americans and the Food Guide Pyramid, which both recommend high consumption of fruits, vegetables, dairy, and grains but also meat.<sup>64</sup> In contrast, the MDS includes high intakes of whole grains, fruits, vegetables, olive oil, low-fat dairy products, fish, poultry, pulses, and nuts. Red meat consumption is assessed as negative within the MDS, but this is not the case with the HEI.<sup>65</sup>

When using diet indices or scores, investigators must additionally pay attention to the food intake levels of the study population and should, thus, define cut-off values to allow discrimination among individuals.<sup>65</sup>

Intervention studies with the Mediterranean diet found statistically significant inverse associations with almost all inflammatory biomarkers, thus providing more evidence that this dietary pattern may help lower low-grade inflammation.

### General methodological aspects

The heterogeneity of results across studies can be explained by the use of different inflammatory markers in the investigations. As metabolite markers, some have previously been associated with disease risks; for example, CRP was found to be a strong predictor of type 2 diabetes<sup>3</sup> or cancer<sup>7</sup> after adjustment for potential confounders, whereas IL-6 showed weaker associations with disease risks, which were not statistically significant.<sup>3,7</sup> Different pathological mechanisms may also explain, to some extent, the heterogeneity among the reported associations with diet, while different physiological pathways involving the biomarkers may account for differences among the dietary patterns associated with inflammatory markers. On the other hand, since inflammatory markers are largely correlated, e.g., IL-6 and CRP, similarities are also possible. For example, while IL-6 induces the production of CRP, at certain concentrations, CRP may stimulate the production of adhesion molecules.<sup>66</sup>

Most of the studies adjusted their analysis for potential confounders such as age, body mass index, total energy intake, physical activity, and medications, but whether the associations in the unadjusted analyses of some studies could be explained by adiposity or other confounders remains uncertain.<sup>18,21,22,24,27,30,43,45</sup> While many studies found statistically significant associations between some dietary patterns and levels of inflammatory biomarkers after adjustment for potential confounders,<sup>16,17,19,23,26,29,31–35,38,39,46,48–50,54–59</sup> the process by which potential confounders were selected was not reported. No evidence was found to indicate that those analyses adjusting for fewer potential confounders showed different results than those investigating more.

The results of this review indicate that the dietary assessment method applied may influence the dietary patterns identified and the classification of individuals on the

pattern score. Using a simple 24-h dietary recall, for example, disregards the day-to-day variation in dietary choices and may result in the identification of dietary patterns that are not typical for the study population.<sup>15</sup> As an example, Kant et al.<sup>56</sup> found statistically significant associations between diet scores or indices and CRP by applying single 24-h recalls in a large population; in contrast, a study utilizing PCA and 48-h recalls in a smaller population found no associations with inflammatory markers.<sup>36</sup> This review shows that the study characteristics and the types of analyses applied, including adjustment factors, differ across studies, making it difficult to draw further conclusions.

All of the observational studies published to date used cross-sectional designs to elucidate associations between dietary patterns and markers of chronic inflammation. Using a prospective design would allow dietary factors to be analyzed as predictors of change in inflammatory markers. While intervention studies provide some information in this respect, in the current context, they are limited to *a priori* dietary patterns and, thus, do not necessarily reflect usual dietary intake. Prospective observational studies are consequently warranted.

## CONCLUSION

The present systematic literature review investigated whether specific dietary patterns are associated with biomarkers of low-grade inflammation. The results show that only observational studies have been reported on to date, and they all examined the association in a cross-sectional manner. The presently available findings support the notion that a positive association exists between Western-type and meat-based diets and low-grade chronic inflammation while an inverse association exists for vegetable- and fruit-based patterns. In order to confirm these associations, it is suggested that prospective studies are strongly needed to investigate dietary patterns as risk factors for changes in biomarkers of inflammation over time.

## Acknowledgments

**Funding.** This research was funded by the Federal Ministry of Education and Research (0315540B).

**Declaration of interest.** The authors have no relevant interests to declare.

## REFERENCES

1. Brooks GC, Blaha MJ, Blumenthal RS. Relation of C-reactive protein to abdominal adiposity. *Am J Cardiol.* 2010;106:56–61.

2. Panagiotakos DB, Pitsavos C, Yannakoulia M, et al. The implication of obesity and central fat on markers of chronic inflammation: the ATTICA study. *Atherosclerosis.* 2005;183:308–315.
3. Pradhan AD, Manson JE, Rifai N, et al. C-reactive protein, interleukin 6, and risk of developing type 2 diabetes mellitus. *JAMA.* 2001;286:327–334.
4. Thorand B, Kolb H, Baumert J, et al. Elevated levels of interleukin-18 predict the development of type 2 diabetes: results from the MONICA/KORA Augsburg Study, 1984–2002. *Diabetes.* 2005;54:2932–2938.
5. Pearson TA, Mensah GA, Alexander RW, et al. Markers of inflammation and cardiovascular disease: application to clinical and public health practice: a statement for healthcare professionals from the Centers for Disease Control and Prevention and the American Heart Association. *Circulation.* 2003;107:499–511.
6. Tsilidis KK, Branchini C, Guallar E, et al. C-reactive protein and colorectal cancer risk: a systematic review of prospective studies. *Int J Cancer.* 2008;123:1133–1140.
7. Il'yasova D, Colbert LH, Harris TB, et al. Circulating levels of inflammatory markers and cancer risk in the Health Aging and Body Composition cohort. *Cancer Epidemiol Biomarkers Prev.* 2005;14:2413–2418.
8. Shibata R, Ouchi N, Murohara T. Adiponectin and cardiovascular disease. *Circ J.* 2009;73:608–614.
9. Li S, Shin HJ, Ding EL, et al. Adiponectin levels and risk of type 2 diabetes: a systematic review and meta-analysis. *JAMA.* 2009;302:179–188.
10. Kelesidis I, Kelesidis T, Mantzoros CS. Adiponectin and cancer: a systematic review. *Br J Cancer.* 2006;94:1221–1225.
11. Galland L. Diet and inflammation. *Nutr Clin Pract.* 2010;25:634–640.
12. Calder PC, Ahluwalia N, Brouns F, et al. Dietary factors and low-grade inflammation in relation to overweight and obesity. *Br J Nutr.* 2011;106(Suppl 3):S5–S78.
13. Hu FB. Dietary pattern analysis: a new direction in nutritional epidemiology. *Curr Opin Lipidol.* 2002;13:3–9.
14. Hoffmann K, Schulze MB, Schienkiewitz A, et al. Application of a new statistical method to derive dietary patterns in nutritional epidemiology. *Am J Epidemiol.* 2004;159:935–944.
15. Tucker KL. Dietary patterns, approaches, and multicultural perspective. *Appl Physiol Nutr Metab.* 2010;35:211–218.
16. Guo H, Niu K, Monma H, et al. Association of Japanese dietary pattern with serum adiponectin concentration in Japanese adult men. *Nutr Metab Cardiovasc Dis.* 2012;22:277–284.
17. Cassidy A, Skidmore P, Rimm EB, et al. Plasma adiponectin concentrations are associated with body composition and plant-based dietary factors in female twins. *J Nutr.* 2009;139:353–358.
18. Nettleton JA, Steffen LM, Schulze MB, et al. Associations between markers of subclinical atherosclerosis and dietary patterns derived by principal components analysis and reduced rank regression in the Multi-Ethnic Study of Atherosclerosis (MESA). *Am J Clin Nutr.* 2007;85:1615–1625.
19. Fragopoulou E, Panagiotakos DB, Pitsavos C, et al. The association between adherence to the Mediterranean diet and adiponectin levels among healthy adults: the ATTICA study. *J Nutr Biochem.* 2010;21:285–289.
20. Fung TT, Rimm EB, Spiegelman D, et al. Association between dietary patterns and plasma biomarkers of obesity and cardiovascular disease risk. *Am J Clin Nutr.* 2001;73:61–67.
21. Esposito K, Marfella R, Ciotola M, et al. Effect of a Mediterranean-style diet on endothelial dysfunction and markers of vascular inflammation in the metabolic syndrome: a randomized trial. *JAMA.* 2004;292:1440–1446.
22. Meyer J, Doring A, Herder C, et al. Dietary patterns, subclinical inflammation, incident coronary heart disease and mortality in middle-aged men from the MONICA/KORA Augsburg cohort study. *Eur J Clin Nutr.* 2011;65:800–807.
23. Centritto F, Iacoviello L, di Giuseppe R, et al. Dietary patterns, cardiovascular risk factors and C-reactive protein in a healthy Italian population. *Nutr Metab Cardiovasc Dis.* 2009;19:697–706.
24. Liese AD, Weis KE, Schulz M, et al. Food intake patterns associated with incident type 2 diabetes: the Insulin Resistance Atherosclerosis Study. *Diabetes Care.* 2009;32:263–268.
25. Heidemann C, Hoffmann K, Spranger J, et al. A dietary pattern protective against type 2 diabetes in the European Prospective Investigation into Cancer and Nutrition (EPIC) Potsdam Study cohort. *Diabetologia.* 2005;48:1126–1134.
26. Schulze MB, Hoffmann K, Manson JE, et al. Dietary pattern, inflammation, and incidence of type 2 diabetes in women. *Am J Clin Nutr.* 2005;82:675–684; quiz 714–715.
27. Hoffmann K, Zyriax BC, Boeing H, et al. A dietary pattern derived to explain biomarker variation is strongly associated with the risk of coronary artery disease. *Am J Clin Nutr.* 2004;80:633–640.
28. Heidemann C, Scheidt-Nave C, Richter A, et al. Dietary patterns are associated with cardiometabolic risk factors in a representative study population of German adults. *Br J Nutr.* 2011;106:1253–1262.
29. Nanri H, Nakamura K, Hara M, et al. Association between dietary pattern and serum C-reactive protein in Japanese men and women. *J Epidemiol.* 2011;21:122–131.

30. Nettleton JA, Matijevic N, Follis JL, et al. Associations between dietary patterns and flow cytometry-measured biomarkers of inflammation and cellular activation in the Atherosclerosis Risk in Communities (ARIC) Carotid Artery MRI Study. *Atherosclerosis*. 2010;212:260–267.
31. Villegas R, Xiang YB, Cai H, et al. Lifestyle determinants of C-reactive protein in middle-aged, urban Chinese men. *Nutr Metab Cardiovasc Dis*. 2012;22:223–230.
32. Eilat-Adar S, Mete M, Nobmann ED, et al. Dietary patterns are linked to cardiovascular risk factors but not to inflammatory markers in Alaska Eskimos. *J Nutr*. 2009;139:2322–2328.
33. Nanri A, Yoshida D, Yamaji T, et al. Dietary patterns and C-reactive protein in Japanese men and women. *Am J Clin Nutr*. 2008;87:1488–1496.
34. Yannakoulia M, Yiannakouris N, Melistas L, et al. A dietary pattern characterized by high consumption of whole-grain cereals and low-fat dairy products and low consumption of refined cereals is positively associated with plasma adiponectin levels in healthy women. *Metabolism*. 2008;57:824–830.
35. Esmailzadeh A, Kimiagar M, Mehrabi Y, et al. Dietary patterns and markers of systemic inflammation among Iranian women. *J Nutr*. 2007;137:992–998.
36. Mikkilä V, Rasanen L, Raitakari OT, et al. Major dietary patterns and cardiovascular risk factors from childhood to adulthood. The Cardiovascular Risk in Young Finns Study. *Br J Nutr*. 2007;98:218–225.
37. Pierce BL, Austin MA, Crane PK, et al. Measuring dietary acculturation in Japanese Americans with the use of confirmatory factor analysis of food-frequency data. *Am J Clin Nutr*. 2007;86:496–503.
38. Nettleton JA, Steffen LM, Mayer-Davis EJ, et al. Dietary patterns are associated with biochemical markers of inflammation and endothelial activation in the Multi-Ethnic Study of Atherosclerosis (MESA). *Am J Clin Nutr*. 2006;83:1369–1379.
39. Lopez-Garcia E, Schulze MB, Fung TT, et al. Major dietary patterns are related to plasma concentrations of markers of inflammation and endothelial dysfunction. *Am J Clin Nutr*. 2004;80:1029–1035.
40. Anderson AL, Harris TB, Tylavsky FA, et al. Dietary patterns, insulin sensitivity and inflammation in older adults. *Eur J Clin Nutr*. 2012;66:18–24.
41. Hlebowicz J, Persson M, Gullberg B, et al. Food patterns, inflammation markers and incidence of cardiovascular disease: the Malmo Diet and Cancer study. *J Intern Med*. 2011;270:365–376.
42. Oliveira A, Rodriguez-Artalejo F, Gao R, et al. Major habitual dietary patterns are associated with acute myocardial infarction and cardiovascular risk markers in a southern European population. *J Am Diet Assoc*. 2011;111:241–250.
43. Bluher M, Rudich A, Kloting N, et al. Two patterns of adipokine and other biomarker dynamics in a long-term weight loss intervention. *Diabetes Care*. 2012;35:342–349.
44. Konstantinidou V, Covas MI, Munoz-Aguayo D, et al. In vivo nutrigenomic effects of virgin olive oil polyphenols within the frame of the Mediterranean diet: a randomized controlled trial. *FASEB J*. 2010;24:2546–2557.
45. Azzini E, Polito A, Fumagalli A, et al. Mediterranean diet effect: an Italian picture. *Nutr J*. 2011;10:125.
46. Carter SJ, Roberts MB, Salter J, et al. Relationship between Mediterranean Diet Score and atherothrombotic risk: findings from the Third National Health and Nutrition Examination Survey (NHANES III), 1988–1994. *Atherosclerosis*. 2010;210:630–636.
47. Shahar DR, Yu B, Houston DK, et al. Dietary factors in relation to daily activity energy expenditure and mortality among older adults. *J Nutr Health Aging*. 2009;13:414–420.
48. Dai J, Miller AH, Bremner JD, et al. Adherence to the Mediterranean diet is inversely associated with circulating interleukin-6 among middle-aged men: a twin study. *Circulation*. 2008;117:169–175.
49. Dedoussis GV, Kanoni S, Mariani E, et al. Mediterranean diet and plasma concentration of inflammatory markers in old and very old subjects in the ZINCAE population study. *Clin Chem Lab Med*. 2008;46:990–996.
50. Fargnoli JL, Fung TT, Olenczuk DM, et al. Adherence to healthy eating patterns is associated with higher circulating total and high-molecular-weight adiponectin and lower resistin concentrations in women from the Nurses' Health Study. *Am J Clin Nutr*. 2008;88:1213–1224.
51. Nettleton JA, Schulze MB, Jiang R, et al. A priori-defined dietary patterns and markers of cardiovascular disease risk in the Multi-Ethnic Study of Atherosclerosis (MESA). *Am J Clin Nutr*. 2008;88:185–194.
52. Boynton A, Neuhauser ML, Wener MH, et al. Associations between healthy eating patterns and immune function or inflammation in overweight or obese postmenopausal women. *Am J Clin Nutr*. 2007;86:1445–1455.
53. Panagiotakos DB, Pitsavos C, Stefanadis C. Dietary patterns: a Mediterranean diet score and its relation to clinical and biological markers of cardiovascular disease risk. *Nutr Metab Cardiovasc Dis*. 2006;16:559–568.
54. Ford ES, Mokdad AH, Liu S. Healthy Eating Index and C-reactive protein concentration: findings from the National Health and Nutrition Examination Survey III, 1988–1994. *Eur J Clin Nutr*. 2005;59:278–283.
55. Fung TT, McCullough ML, Newby PK, et al. Diet-quality scores and plasma concentrations of markers of inflammation and endothelial dysfunction. *Am J Clin Nutr*. 2005;82:163–173.
56. Kant AK, Graubard BI. A comparison of three dietary pattern indexes for predicting biomarkers of diet and disease. *J Am Coll Nutr*. 2005;24:294–303.
57. Chrysohoou C, Panagiotakos DB, Pitsavos C, et al. Adherence to the Mediterranean diet attenuates inflammation and coagulation process in healthy adults: the ATTICA Study. *J Am Coll Cardiol*. 2004;44:152–158.
58. George SM, Neuhauser ML, Mayne ST, et al. Postdiagnosis diet quality is inversely related to a biomarker of inflammation among breast cancer survivors. *Cancer Epidemiol Biomarkers Prev*. 2010;19:2220–2228.
59. Panagiotakos DB, Dimakopoulou K, Katsouyanni K, et al. Mediterranean diet and inflammatory response in myocardial infarction survivors. *Int J Epidemiol*. 2009;38:856–866.
60. Salas-Salvado J, Garcia-Arellano A, Estruch R, et al. Components of the Mediterranean-type food pattern and serum inflammatory markers among patients at high risk for cardiovascular disease. *Eur J Clin Nutr*. 2008;62:651–659.
61. Mantzoros CS, Williams CJ, Manson JE, et al. Adherence to the Mediterranean dietary pattern is positively associated with plasma adiponectin concentrations in diabetic women. *Am J Clin Nutr*. 2006;84:328–335.
62. Martinez ME, Marshall JR, Sechrest L. Invited commentary: factor analysis and the search for objectivity. *Am J Epidemiol*. 1998;148:17–19.
63. McCann SE, Marshall JR, Brasure JR, et al. Analysis of patterns of food intake in nutritional epidemiology: food classification in principal components analysis and the subsequent impact on estimates for endometrial cancer. *Public Health Nutr*. 2001;4:989–997.
64. Kennedy ET, Ohls J, Carlson S, et al. The Healthy Eating Index: design and applications. *J Am Diet Assoc*. 1995;95:1103–1108.
65. Waijers PM, Feskens EJ, Ocke MC. A critical review of predefined diet quality scores. *Br J Nutr*. 2007;97:219–231.
66. Pasceri V, Willerson JT, Yeh ET. Direct proinflammatory effect of C-reactive protein on human endothelial cells. *Circulation*. 2000;102:2165–2168.
